# Supplementary material
Source: Springer Nature journal article supplement (https://www.springermedizin.de/resource/supplementary/13012_2010_421_MOESM3_ESM.pdf/9629722)
Supplement: MOESM3 [file 9629722]

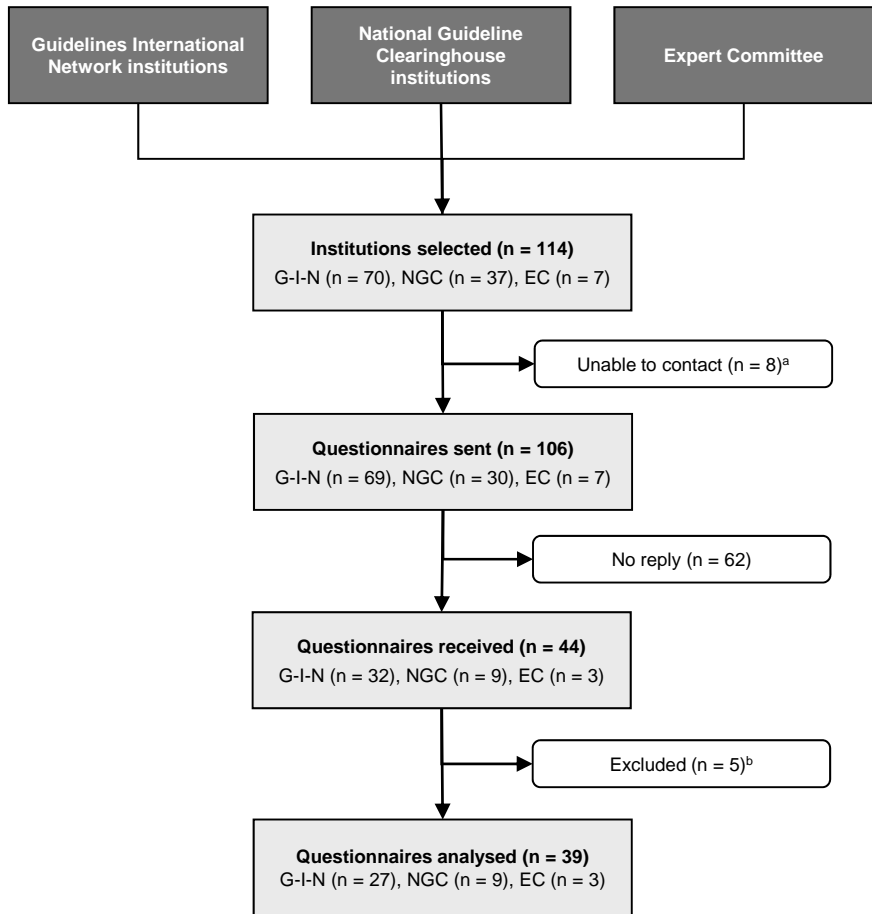

<sup>a</sup>email not delivered (n = 2), letter requesting email not answered (n = 3), no email (n = 3).

<sup>b</sup>>20% questions not answered.

Abbreviations: G-I-N: Guidelines International Network; NGC: National Guideline Clearinghouse; EC: Expert Committee.
